# Supplementary material for: Taskforce report on the diagnosis and clinical management of COVID-19 associated pulmonary aspergillosis
Source: Springer Nature journal article supplement (doi:10.1007/s00134-021-06449-4), 2021-06-23
Supplement: MOESM1 [file 134_2021_6449_MOESM1_ESM.docx]

**Table S1.** Underlying diseases and identified risk factors for CAPA in published case series.

| **Country** | **# of CAPA cases** | **EORTC/MSGERC**  **factor (# pts)** | | **Other underlying diseases** | **Identified risk factors** | | | **Ref.** |
| --- | --- | --- | --- | --- | --- | --- | --- | --- |
| France | 9 | Myeloma + steroids  (1), steroids (1) | | Hypertension, obesity, diabetes, ischemic heart disease, asthma | N.A. | | | 15 |
| France* | 21 | Solid organ transplant  (1), myeloma (1) | | Hypertension, diabetes, obesity, coronary disease, asthma | Cumulative corticosteroid dose ≥100 mg higher in CAPA (OR, 3.7; IC95% 1.0 -9.7) | | | 35 |
| Germany | 5 | Not present | | Hypertension, obesity, hypercholesterolemia, diabetes, COPD, emphysema | N.A. | | | 16 |
| NL | 6 | Not present | | COPD, asthma, cardiomyopathy | N.A. | | | 17 |
| Belgium | 6 | AML (1) | | Hypertension, obesity, hypercholesterolemia, diabetes, HIV | N.A. | | | 18 |
| Italy | 30 | Malignancies (2), solid organ transplant, chronic steroid  treatment | | Hypertension, obesity, hypercholesterolemia, diabetes, coronary disease, cerebrovascular disease, chronic kidney disease, COPD | Chronic steroid therapy was significantly more frequent in CAPA compared to non-CAPA  (p=0.02) | | | 19 |
| UK | 19 | Hematological malignancy (1), corticosteroid therapy  (15) – dose and duration not specified | | Vasculitis, essential hydrocortisone thrombocytopenia, diabetes, chronic respiratory illness, solid cancer, autoimmune disease, obesity, hypertension, Alzheimer disease, chronic kidney disease, | Association between multiple positive *Aspergillus*/BDG positive test and the use of high dose corticosteroids (p=0.007) and chronic  respiratory condition (p=0.05) | | | 20 |
| Belgium | 4 | Not present |  | Obesity, chronic kidney disease | N.A. |  |  | 21 |
| Switzerland | 3 | Not present |  | Hypertension, obesity, diabetes, pulmonary fibrosis, asthma | N.A. |  |  | 22 |
| France | 19 | Not present |  | Hypertension, diabetes, malignancy, COPD, asthma, tuberculosis, cardiopathy, ABPA, schizophrenia, glaucoma,  HIV | N.A. |  |  | 23 |
| France | 7 | Kidney  transplantation (2), liver transplantation  (1), steroids (1) | | Hypertension, obesity, diabetes, tabagism,  dyslipidemia | Preexisting host factor (p=0.03), solid organ transplant (p=0.004), long term (>3weeks) corticosteroid therapy (any dose)(p=0.01) | | | 26 |
| USA | 20 | Multiple myeloma (2) | | Hypertension, obesity, diabetes, liver disease, etc | Solid tumor (p=0.001); multiple myeloma (p=0.007); BMI (0.047); coagulopathy (p=0.027); weight loss (0.029) | | | 29 |

*Includes cohort of Alanio et al.15
